# Supplementary material for: The Role of Fluorinated IL as an Interfacial Agent in P(VDF-CTFE)/Graphene Composite Films
Source: PubMed Central journal article supplement (PMC6724409; doi:10.3390/nano9081181), 2019-08-19
Supplement: nanomaterials-09-01181-s001.pdf [file nanomaterials-09-01181-s001.pdf]

# The Role of Fluorinated IL as an Interfacial Agent in P(VDF-CTFE)/Graphene Composite Films

Jing Yang, Sébastien Pruvost \*, Sébastien Livi and Jannick Duchet-Rumeau \*

Laboratory of polymer materials Engineering, UMR CNRS 5223, INSA Lyon, University of Lyon, 69621 Villeurbanne, France

\* Correspondence: sebastien.pruvost@insa-lyon.fr (S.P.); jannick.duchet@insa-lyon.fr (J.D.-R.);

Tel.:+33-04-72438291 (S.P.); +33-04-72438548 (J.D.-R.)

## 1. No residual DMF in the resulting composite films

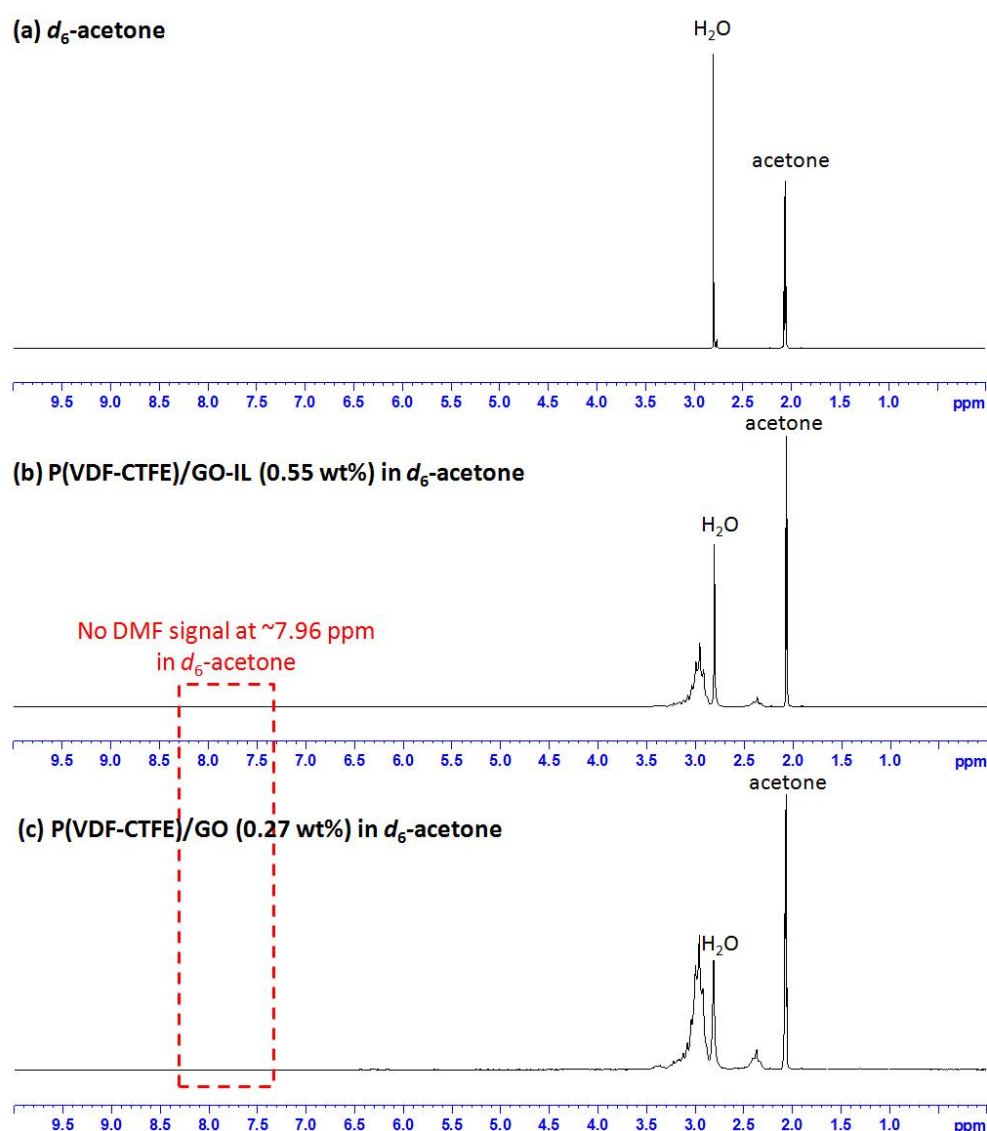

**Figure S1.**  $^1\text{H}$  NMR spectra of deuterated acetone ( $d_6$ -acetone) solvent (a), P(VDF-CTFE)/GO-IL (0.55 wt%) (b) and P(VDF-CTFE)/GO (0.27 wt%) composites in  $d_6$ -acetone. Note that the signal of DMF in  $d_6$ -acetone at around 7.96 ppm corresponding to  $(\text{CH}_3)_2\text{N}-\text{C}(\text{O})\text{H}$  (*J. Org. Chem.* **1997**, 62, 7512-7515) is not visible in the spectra of P(VDF-CTFE)/GO-IL and P(VDF-CTFE)/GO composites, suggesting total removing of DMF by using the drying conditions: first dried at 60 °C in air oven overnight, and then under vacuum at 80 °C for 48 h.

## 2. Stability of IL-C8F13 during the chemical reduction by hydrazine

The IL-C8F13 is chemically stable under the reduction conditions by hydrazine (95 °C for 3 h in DMF), which can be confirmed by NMR spectra of IL before and after hydrazine treatment.

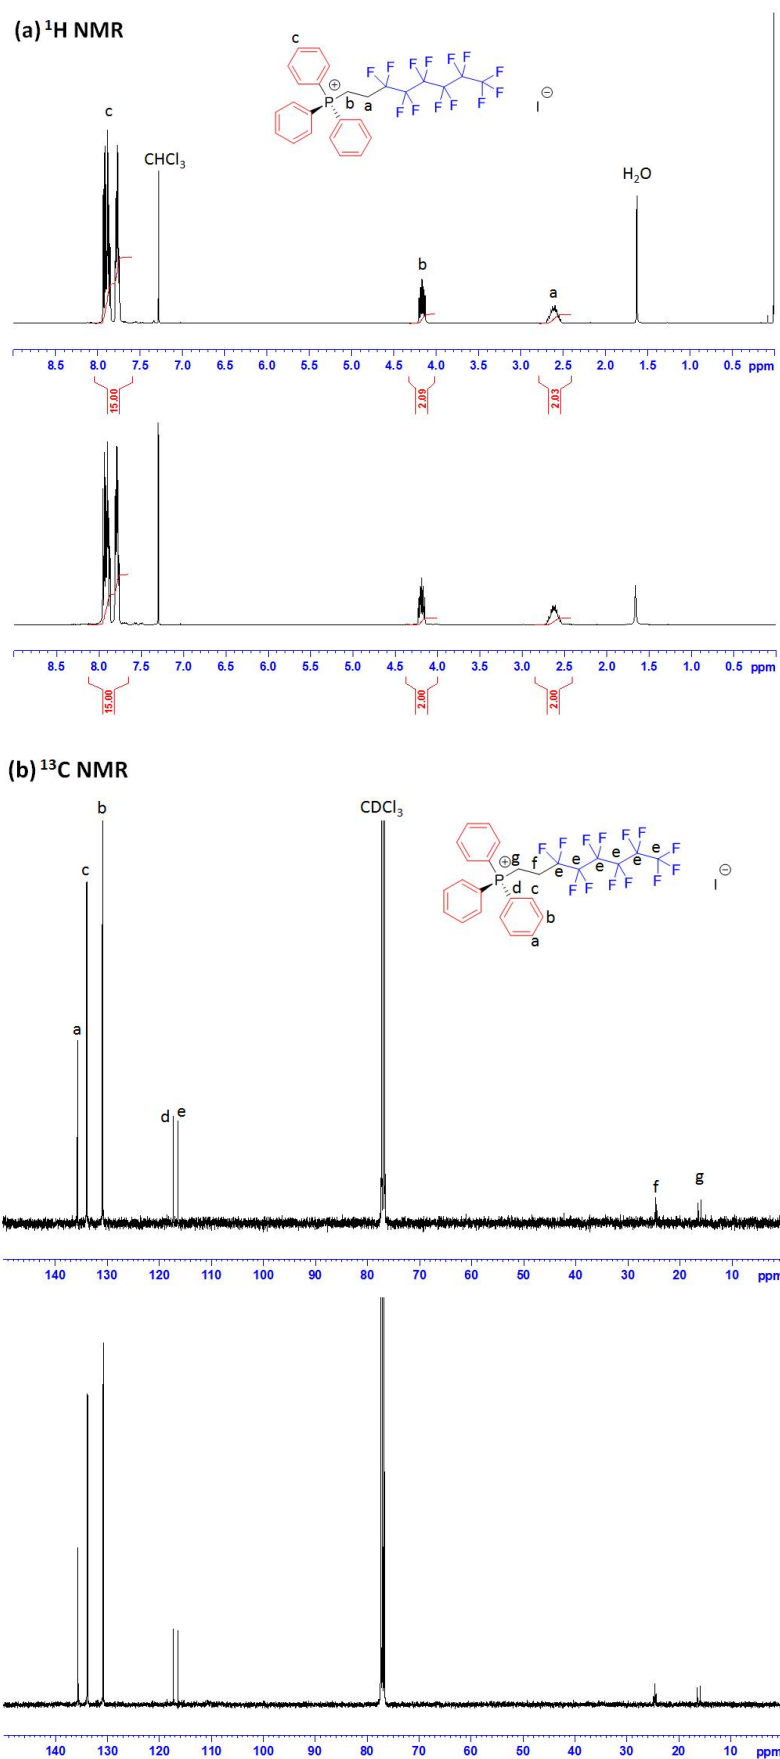

(c)  $^{19}\text{F}$  NMR

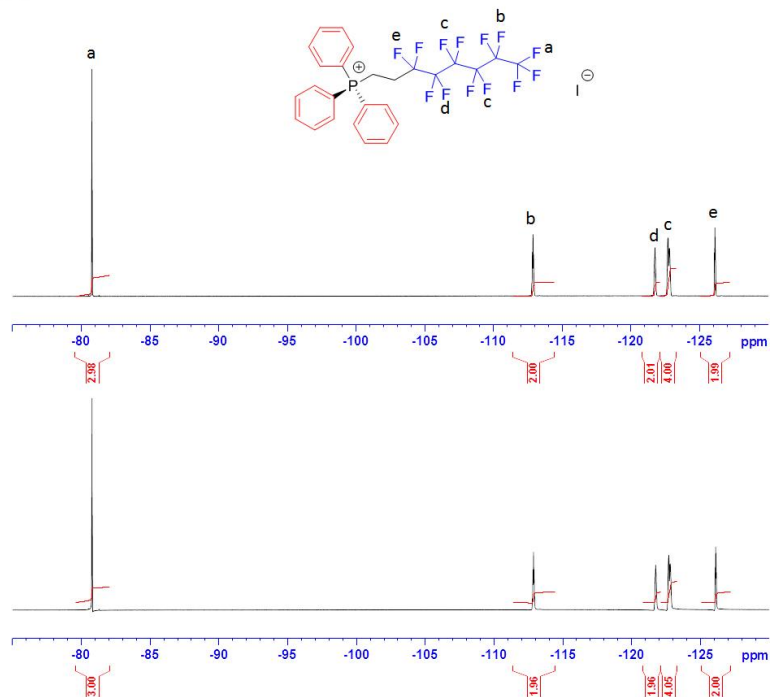

(d)  $^{31}\text{P}$  NMR

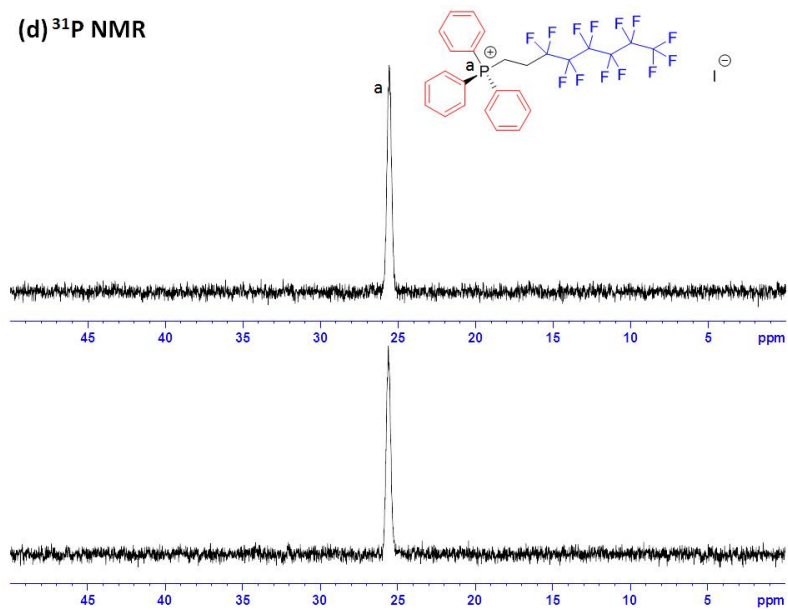

**Figure S2.**  $^1\text{H}$ ,  $^{13}\text{C}$ ,  $^{19}\text{F}$  and  $^{31}\text{P}$  NMR spectra of IL-C8F13 before (upper) and after (lower) hydrazine treatment.

3. DSC traces of neat P(VDF-CTFE) and its composites containing IL, GO, rGO, GO-IL, rGO-IL with different loading contents during heat/cool/heat runs

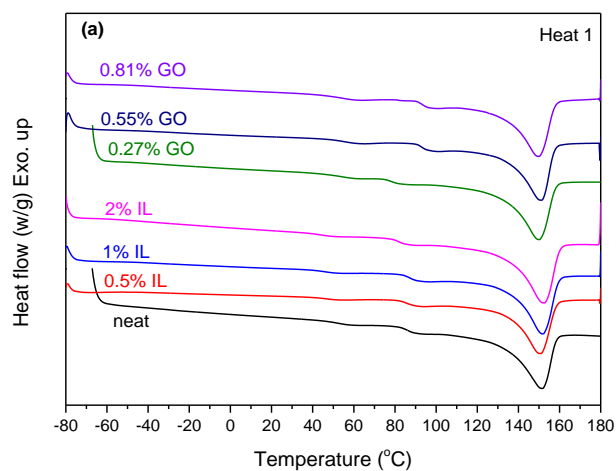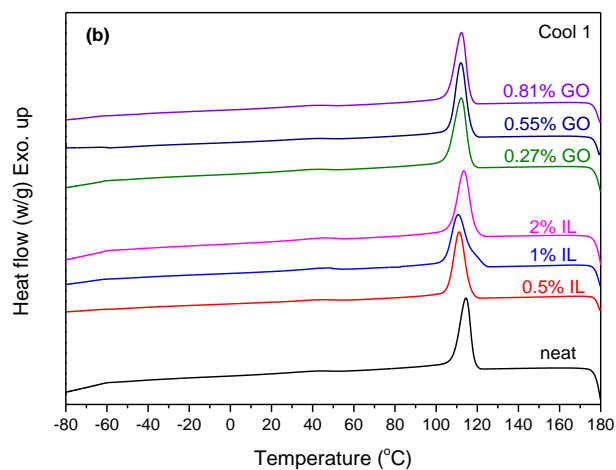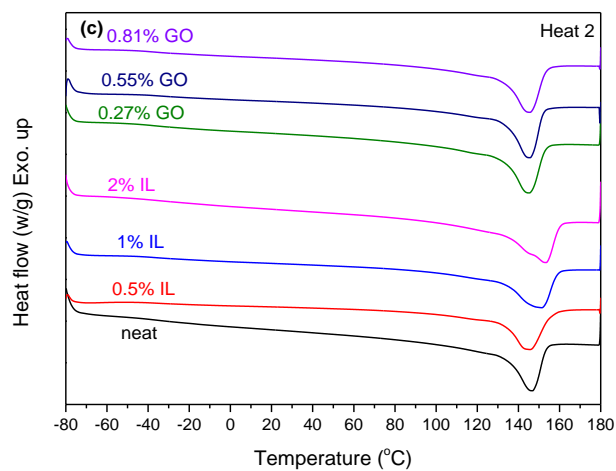

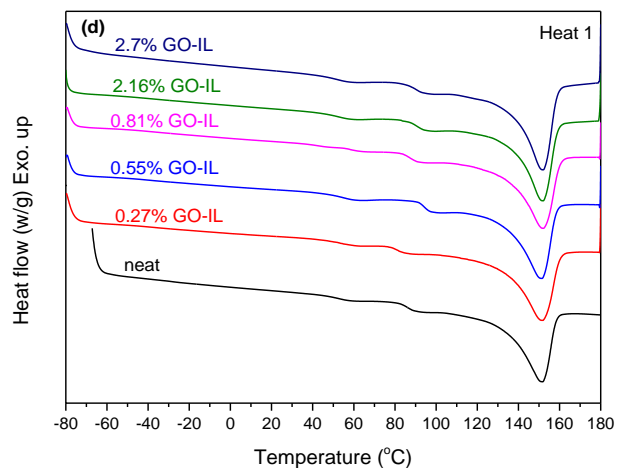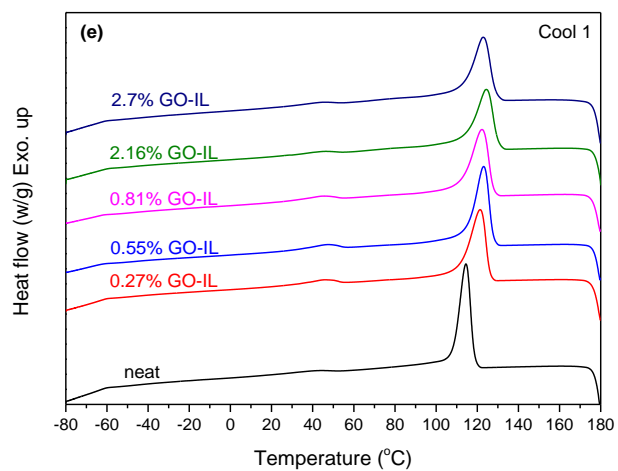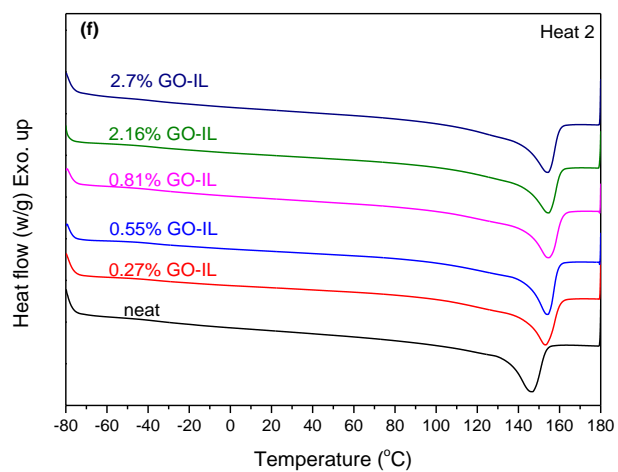

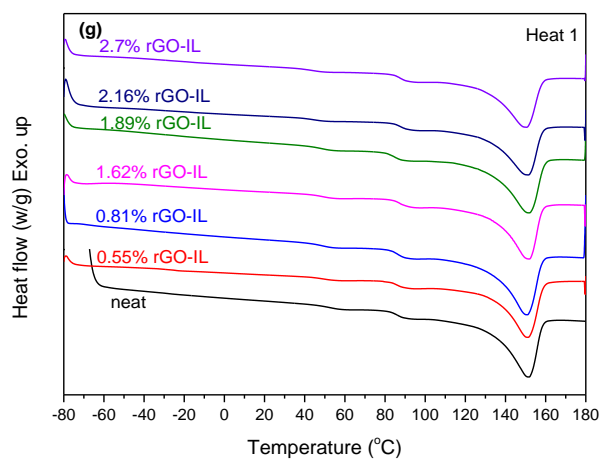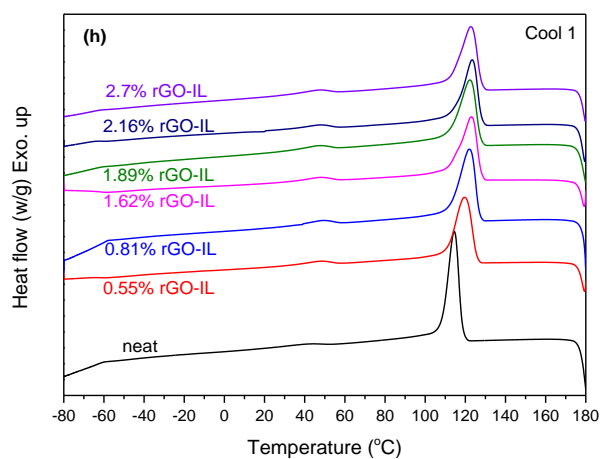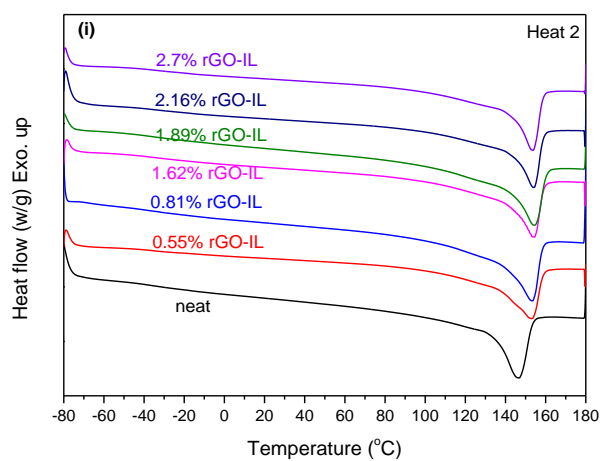

**Figure S3.** DSC thermograms of neat P(VDF-CTFE) and its composites containing GO, GO-IL and rGO-IL during first and second heating run and the first cooling run.

**Table S1.**  $T_c$ ,  $T_m$  and  $\Delta H$  of neat P(VDF-CTFE) and composites from DSC thermograms.

| Sample           | Heating 1  |                  | Cooling 1  | Heating 2  |                  |
|------------------|------------|------------------|------------|------------|------------------|
|                  | $T_m$ (°C) | $\Delta H$ (J/g) | $T_c$ (°C) | $T_m$ (°C) | $\Delta H$ (J/g) |
| neat             | 152        | 32               | 114        | 147        | 30               |
| 0.5 wt% IL-C8F13 | 151        | 31               | 111        | 146        | 35               |
| 1 wt% IL-C8F13   | 152        | 34               | 111        | 151        | 35               |
| 2 wt% IL-C8F13   | 153        | 37               | 114        | 153        | 33               |
| 0.27 wt% GO      | 150        | 37               | 112        | 145        | 34               |
| 0.55 wt% GO      | 151        | 31               | 112        | 146        | 35               |
| 0.81 wt% GO      | 150        | 33               | 112        | 146        | 34               |
| 0.27 wt% GO-IL   | 152        | 37               | 121        | 153        | 35               |
| 0.55 wt% GO-IL   | 152        | 34               | 123        | 154        | 35               |
| 0.81 wt% GO-IL   | 152        | 37               | 122        | 155        | 34               |
| 2.16 wt% GO-IL   | 152        | 37               | 124        | 155        | 32               |
| 2.70 wt% GO-IL   | 152        | 40               | 123        | 154        | 34               |
| 0.55 wt% rGO-IL  | 151        | 33               | 120        | 153        | 32               |
| 0.81 wt% rGO-IL  | 151        | 35               | 122        | 153        | 32               |
| 1.62 wt% rGO-IL  | 152        | 32               | 123        | 155        | 30               |
| 1.89 wt% rGO-IL  | 152        | 35               | 122        | 155        | 30               |
| 2.16 wt% rGO-IL  | 152        | 30               | 123        | 154        | 30               |
| 2.70 wt% rGO-IL  | 151        | 31               | 123        | 154        | 30               |

#### 4. DMA curves of neat P(VDF-CTFE) and its composites containing IL, GO, GO-IL and rGO-IL

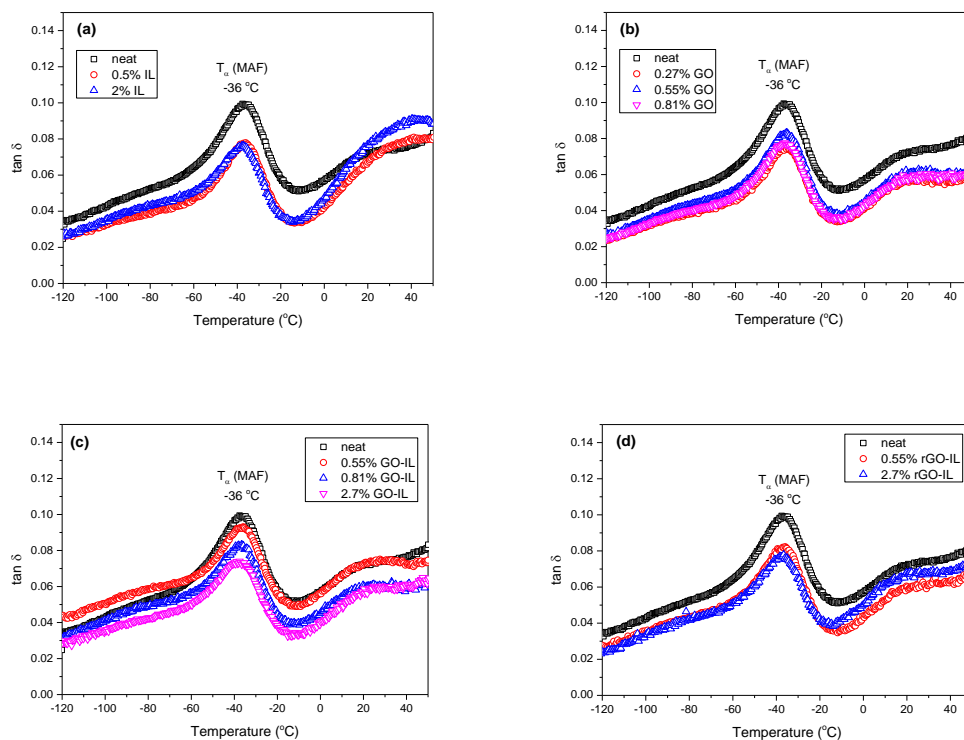

**Figure S4.** Dynamic mechanical loss tangent ( $\tan \delta$ ) as a function of temperature for neat P(VDF-CTFE) and composites containing IL (a), GO (b), GO-IL (c) and rGO-IL (d).

## 5. Dielectric properties of P(VDF-CTFE)/GO-IL composites

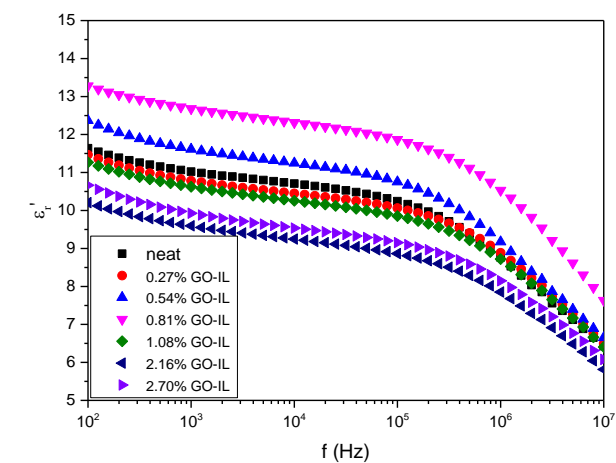

(a)

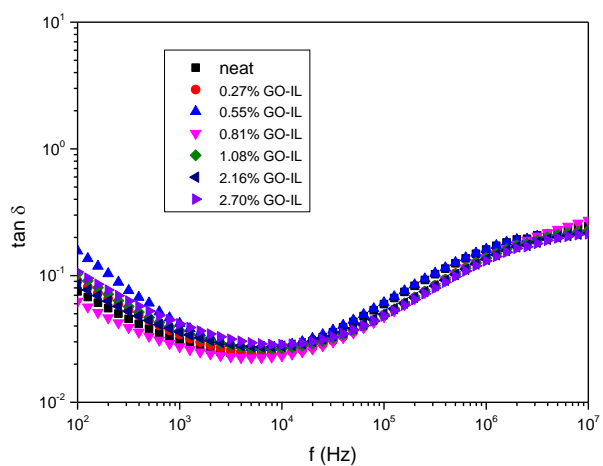

(b)

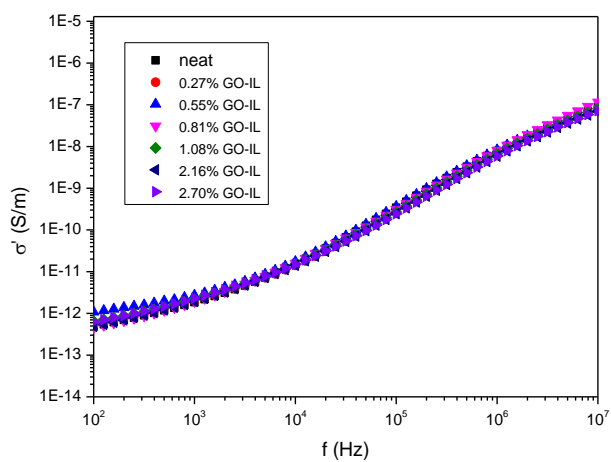

(c)

**Figure S5.** Relative dielectric permittivity ( $\epsilon'$ ) (a), loss tangent ( $\tan \delta$ ) (b) and AC conductivity ( $\sigma'$ ) (c) of P(VDF-CTFE)/GO-IL composites as a function of frequency at RT with different compositions.
